# Supplementary material for: Unravelling the Complexity of Plant Defense Induced by a Simultaneous and Sequential Mite and Aphid Infestation
Source: PubMed Central journal article supplement (PMC6412847; doi:10.3390/ijms20040806), 2019-02-13
Supplement: ijms-20-00806-s001.pdf [file ijms-20-00806-s001.pdf]

## Supplementary material

**Table S1.** The value of relative gene expression changes presented on the Figure 2.

### A. The value of relative gene expression changes presented on the Figure 2A.

| analyzed gene | relative gene expression fold change |                          | p-value               |                          |
|---------------|--------------------------------------|--------------------------|-----------------------|--------------------------|
|               | Tu <sup>+</sup> local                | Tu <sup>+</sup> systemic | Tu <sup>+</sup> local | Tu <sup>+</sup> systemic |
| <i>PR1</i>    | 541.72                               | 1291.76                  | 0.0004                | 0.0005                   |
| <i>LOX3</i>   | 7.44                                 | 28.54                    | 1.97232E-05           | 0.004                    |
| <i>WRKY33</i> | 1.35                                 | 1.46                     | 0.16                  | 0.06                     |
| <i>CYP79B</i> | 14.67                                | 10.37                    | 0.0005                | 0.04                     |
| <i>MYB28</i>  | 0.23                                 | 0.91                     | 8.03605E-07           | 0.38                     |
| <i>MYB29</i>  | 0.54                                 | 0.82                     | 0.00098               | 0.14                     |

### B. The value of relative gene expression changes presented on the Figure 2B.

| analyzed gene | relative gene expression fold change |                          | p-value               |                          |
|---------------|--------------------------------------|--------------------------|-----------------------|--------------------------|
|               | Mp <sup>+</sup> local                | Mp <sup>+</sup> systemic | Mp <sup>+</sup> local | Mp <sup>+</sup> systemic |
| <i>PR1</i>    | 2.14                                 | 15.91                    | 0.003                 | 0.0003                   |
| <i>LOX3</i>   | 2.06                                 | 8.88                     | 0.007                 | 0.0001                   |
| <i>WRKY33</i> | 2.16                                 | 1.90                     | 0.29                  | 0.06                     |
| <i>CYP79B</i> | 0.96                                 | 0.56                     | 0.55                  | 0.003                    |
| <i>MYB28</i>  | 0.68                                 | 0.58                     | 0.03                  | 0.003                    |
| <i>MYB29</i>  | 0.62                                 | 0.29                     | 0.0002                | 7.25437E-05              |

### C. The value of relative gene expression changes presented on the Figure 2C.

| analyzed gene | relative gene expression fold change |                                  | p-value                          |                                  |
|---------------|--------------------------------------|----------------------------------|----------------------------------|----------------------------------|
|               | Tu <sup>+</sup> /Mp <sup>+</sup>     | Mp <sup>+</sup> /Tu <sup>+</sup> | Tu <sup>+</sup> /Mp <sup>+</sup> | Mp <sup>+</sup> /Tu <sup>+</sup> |
| <i>PR1</i>    | 36.84                                | 13.24                            | 0.0003                           | 9.27755E-06                      |
| <i>LOX3</i>   | 3.31                                 | 0.78                             | 5.20216E-05                      | 0.02                             |
| <i>WRKY33</i> | 2.57                                 | 0.44                             | 0.05                             | 0.04                             |
| <i>CYP79B</i> | 1.37                                 | 0.45                             | 0.01                             | 0.004                            |
| <i>MYB28</i>  | 1.01                                 | 0.95                             | 0.95                             | 0.58                             |
| <i>MYB29</i>  | 0.73                                 | 0.77                             | 0.002                            | 0.001                            |

## Supplementary material

**Table S2. List of primers used in RT-qPCR analysis**

| <b>locus</b> | <b>gene name</b> | <b>forward primer</b>    | <b>reverse primer</b>     |
|--------------|------------------|--------------------------|---------------------------|
| At3g18780    | <i>ACT2</i>      | TTCACCACAACAGCAGAGCGGG   | CGTGATGACTTGCCCATCGGGT    |
| At2g22330    | <i>CYP79B3</i>   | TCTACCGATGCTTACGGGATTG   | TACAAGTTCCTTAATGGTTGGTTTG |
| At1g17420    | <i>LOX3</i>      | AGCCGAGTAGAGAAGCCA       | CGACCTTAGGGAGAGGAAAC      |
| At5g61420    | <i>MYB28</i>     | TGTCTGATTAGGGTTGAAACGGTG | CTATGACCGACCACTTGTTGCCA   |
| At5g07690    | <i>MYB29</i>     | TCCTACAACGGTCGTCTACCA    | TTCTTCGGCAGTCCATGCTC      |
| At2g14610    | <i>PR1</i>       | TCTAAGGGTTCACAACCAG      | CGCAGCGTAGTTGTAGTTA       |
| At2g38470    | <i>WRKY33</i>    | TCCTGCAGCTCGTGGTAGCGGT   | GGCGTAACCAAAGGCCCGGT      |
